# Supplementary material
Source: MDPI journal article supplement (https://www.mdpi.com/2073-4441/13/16/2214)
Supplement: s1 [file s1]

# Do Freshwater Fish Eat Microplastics? A Review with A Focus on Effects on Fish Health and Predictive Traits of MPs Ingestion

Silvia Galafassi <sup>1,\*</sup>, Claudia Campanale <sup>2</sup>, Carmine Massarelli <sup>2</sup>, Vito Felice Uricchio <sup>2</sup> and Pietro Volta <sup>1</sup>

<sup>1</sup> CNR Water Research Institute, L.go Tonolli 50, 28922 Verbania, Italy; pietro.volta@cnr.it

<sup>2</sup> CNR Water Research Institute, V.le F. De Blasio 5, 70132 Bari, Italy; claudia.campanale@ba.irsra.cnr.it (C.C.); carmine.massarelli@ba.irsra.cnr.it (C.M.); vito.uricchio@ba.irsra.cnr.it (V.F.U.)

\* Correspondence: silvia.galafassi@cnr.it

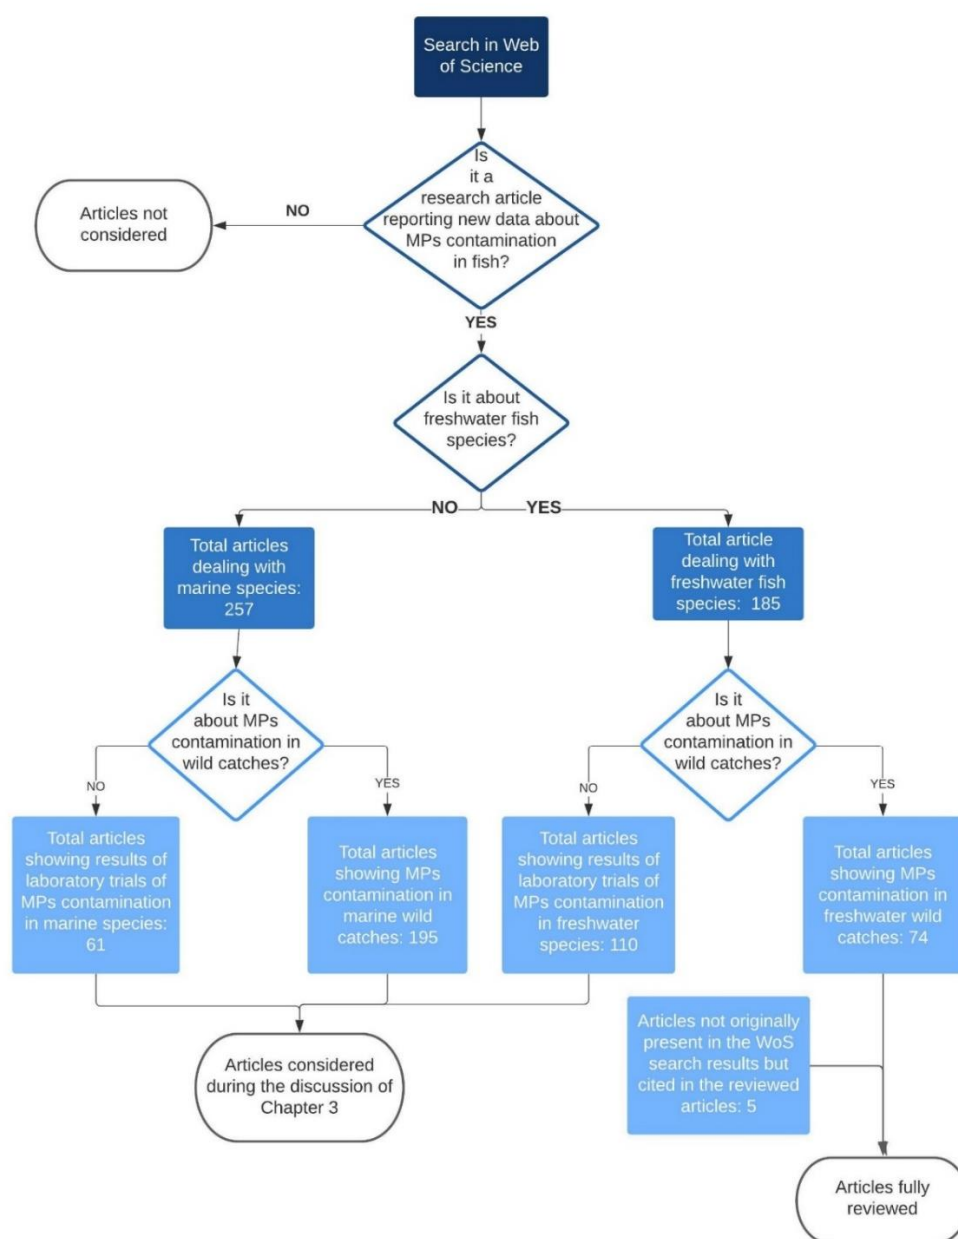

**Figure S1.** Explanatory flow chart of the decisional process used to include/exclude articles in this revision.

**Table S1.** Summary of all the fish species investigated for MPs ingestion with references to the research article, the type of environment and the country in which have been sampled. In the case of taxonomy ambiguity with species registered on FishBase (www.fishbase.se), the name reported on the original article is reported in brackets.

| Species                                          | Publication reference | Type of environment | Country                      |
|--------------------------------------------------|-----------------------|---------------------|------------------------------|
| <i>Abramis brama</i>                             | [1,2]                 | River, lake         | Germany, Switzerland         |
| <i>Acanthogobius flavimanus</i>                  | [3]                   | Estuary             | China                        |
| <i>Acanthopagrus latus</i>                       | [4]                   | Wetland             | China                        |
| <i>Acentrogobius viridipunctatus</i>             | [4]                   | Wetland             | China                        |
| <i>Acnodon normani</i>                           | [5]                   | River               | Brazil                       |
| <i>Aequidens tetramerus</i>                      | [6]                   | River               | Brazil                       |
| <i>Alburnoides bipunctatus</i>                   | [7]                   | River               | France                       |
| <i>Alburnus alburnus</i>                         | [1,7,8]               | River, lake         | Germany, France, Switzerland |
| <i>Alosa aestivais</i>                           | [9]                   | River               | USA                          |
| <i>Ambassis ambassis</i>                         | [10]                  | Estuary             | China                        |
| <i>Ambassis dussumieri</i>                       | [11]                  | Estuary             | South Africa                 |
| <i>Ameiurus melas</i>                            | [7]                   | River               | France                       |
| <i>Amoya chlorostigmatoides</i>                  | [4]                   | Wetland             | China                        |
| <i>Anguila anguila</i>                           | [7]                   | River               | France                       |
| <i>Aplocheilus sp</i>                            | [12]                  | River               | Indonesia                    |
| <i>Astyanax bimaculatus</i>                      | [13]                  | River               | Brazil                       |
| <i>Astyanax lacustris</i>                        | [13,14]               | River               | Brazil                       |
| <i>Astyanax rutilus</i>                          | [15]                  | Estuary             | Argentina                    |
| <i>Barbatula barbatula</i>                       | [1,7]                 | River, lake         | Germany, France              |
| <i>Barbobymus goniontus</i>                      | [16]                  | Reservoir           | Thailand                     |
| <i>Barbus barbus</i>                             | [1,7]                 | River, lake         | France, Germany              |
| <i>Blicca bjoerkna</i>                           | [1]                   | River, lake         | Germany                      |
| <i>Boleophthalmus pectinirostris</i>             | [3,17]                | Estuary             | China                        |
| <i>Bostrychus sinensis</i>                       | [3]                   | Estuary             | China                        |
| <i>Bryconamericus aff. iheringii</i>             | [14]                  | River               | Brazil                       |
| <i>Bryconops melanurus</i>                       | [6]                   | River               | Brazil                       |
| <i>Callionymus curvicornis (C. richardsoni )</i> | [4]                   | Wetland             | China                        |
| <i>Caquetaia kraussii</i>                        | [18,19]               | Wetland, estuary    | Colombia                     |
| <i>Caranx latus</i>                              | [18]                  | Wetland             | Colombia                     |
| <i>Carassius auratus</i>                         | [20–25]               | River, lake         | China, Taiwan, Korea         |
| <i>Carassius carassius</i>                       | [26]                  | Lake                | Ethiopia                     |
| <i>Carassius cuvieri</i>                         | [27]                  | River               | Korea                        |
| <i>Carassius gibelio</i>                         | [28]                  | River               | China                        |
| <i>Carnegiella strigata</i>                      | [6]                   | River               | Brazil                       |
| <i>Carpoides cyprinus</i>                        | [29]                  | River               | USA                          |
| <i>Cathorops agassizii</i>                       | [30]                  | Estuary             | Brazil                       |
| <i>Cathorops mapale</i>                          | [18]                  | Wetland             | Colombia                     |
| <i>Catostomus commersonii</i>                    | [29,31]               | River               | Canada, USA                  |
| <i>Centropomus ensiferus</i>                     | [18]                  | Wetland             | Colombia                     |
| <i>Centropomus pectinatus</i>                    | [18]                  | Wetland             | Colombia                     |
| <i>Centropomus undecimalis</i>                   | [18,32]               | Wetland, estuary    | Colombia, Brazil             |
| <i>Cetopsorhamdia iheringi</i>                   | [14]                  | River               | Brazil                       |
| <i>Channa argus</i>                              | [27]                  | River               | Korea                        |
| <i>Channa asiatica</i>                           | [21]                  | River               | China                        |
| <i>Channa maculata</i>                           | [28]                  | River               | China                        |
| <i>Chanos chanos</i>                             | [33]                  | Aquaculture ponds   | Indonesia                    |
| <i>Characidium aff. zebra</i>                    | [14]                  | River               | Brazil                       |
| <i>Chrysichthys nigrodigitatus</i>               | [34]                  | Lake                | Nigeria                      |
| <i>Cirrhinus molitorella</i>                     | [21,28,35]            | River               | China                        |
| <i>Clarias anguillaris</i>                       | [36]                  | River               | Ghana                        |
| <i>Clarias batrachus</i>                         | [10]                  | Estuary             | China                        |
| <i>Clarias fuscus</i>                            | [21]                  | River               | China                        |
| <i>Clarias gariepinus</i>                        | [26]                  | Lake                | Ethiopia                     |
| <i>Clupeichtys aesarnensis</i>                   | [16]                  | Reservoir           | Thailand                     |

|                                                     |                                   |                          |                                                |
|-----------------------------------------------------|-----------------------------------|--------------------------|------------------------------------------------|
| <i>Cobitis taenia</i>                               | [1]                               | River, lake              | Germany                                        |
| <i>Coilia grayi</i>                                 | [21]                              | River                    | China                                          |
| <i>Coilia mystus</i>                                | [3,17]                            | Estuary                  | China                                          |
| <i>Coilia nasus</i>                                 | [17]                              | Estuary                  | China                                          |
| <i>Colomesus psittacus</i>                          | [37]                              | Estuary                  | Brazil                                         |
| <i>Copella arnoldi</i>                              | [6]                               | River                    | Brazil                                         |
| <i>Coptodon zillii</i>                              | [28,34]                           | River, lake              | China, Nigeria                                 |
| <i>Coregonus wartmanni</i>                          | [1]                               | River, lake              | Germany                                        |
| <i>Crenicichla gr regani</i>                        | [6]                               | River                    | Brazil                                         |
| <i>Ctenopharyngodon idella</i>                      | [21,28]                           | River                    | China                                          |
| <i>Culter alburnus</i>                              | [38]                              | River                    | China                                          |
| <i>Culter dabryi</i>                                | [38]                              | River                    | China                                          |
| <i>Culter mongolicus</i>                            | [38]                              | River                    | China                                          |
| <i>Culter oxycephaloides</i>                        | [38]                              | River                    | China                                          |
| <i>Curimatella lepidura</i>                         | [39]                              | Reservoir                | Brazil                                         |
| <i>Cyclocheilichthys repasson</i>                   | [16,40]                           | Reservoir, river         | Thailand                                       |
| <i>Cynoglossus puncticeps</i>                       | [4]                               | Wetland                  | China                                          |
| <i>Cynoglossus trigrammus</i>                       | [3]                               | Estuary                  | China                                          |
| <i>Cynoscion acoupa</i>                             | [41]                              | Estuary                  | Brazil                                         |
| <i>Cyphocharax voga</i>                             | [15]                              | Estuary                  | Argentina                                      |
| <i>Cyprinella spiloptera</i>                        | [29]                              | River                    | USA                                            |
| <i>Cyprinus carpio</i>                              | [7,15,20,21,23,25,26–28,38,42,43] | Lake, river, estuary     | Argentina, China, Ethiopia, France, Korea, USA |
| <i>Dendrophysa russelii</i>                         | [4]                               | Wetland                  | China                                          |
| <i>Dicentrarchus labrax</i>                         | [44]                              | Estuary                  | Portugal                                       |
| <i>Dorosoma cepedianum</i>                          | [29,45]                           | Reservoir, river         | USA                                            |
| <i>Esox lucius</i>                                  | [1,2,7,31]                        | River, lake              | Canada, Switzerland, Germany, France           |
| <i>Eucalia inconstans</i>                           | [31]                              | River                    | Canada                                         |
| <i>Eucinostomus argenteus</i>                       | [18]                              | Wetland                  | Colombia                                       |
| <i>Eucinostomus melanopterus</i>                    | [46]                              | Estuary                  | Brazil                                         |
| <i>Eugerres plumieri</i>                            | [18,19]                           | Wetland, estuary         | Colombia                                       |
| <i>Fundulus diaphanus</i>                           | [29]                              | River                    | USA                                            |
| <i>Gambusia holbrooki</i>                           | [47,48]                           | Costal lagoons, wetlands | Spain, Australia                               |
| <i>Geophagus brasiliensis</i>                       | [13]                              | River                    | Brazil                                         |
| <i>Gerres decacanthus</i> (Gerreomorpha decacantha) | [4]                               | Wetland                  | China                                          |
| <i>Gerres filamentosus</i>                          | [4]                               | Wetland                  | China                                          |
| <i>Glossogobius giuris</i>                          | [3]                               | Estuary                  | China                                          |
| <i>Gobio gobio</i>                                  | [1,49–51]                         | River, lake              | Belgium, France, Germany, Poland               |
| <i>Gobio occitaniae</i>                             | [7]                               | River                    | France                                         |
| <i>Gymnocephalus cernua</i>                         | [1]                               | River, lake              | Germany                                        |
| <i>Gymnocypris przewalskii</i>                      | [52]                              | Lake                     | China                                          |
| <i>Haemulopsis corvinaeformis</i>                   | [53]                              | Estuary                  | Brazil                                         |
| <i>Hemibagrus spilopterus</i>                       | [16,40]                           | Reservoir, river         | Thailand                                       |
| <i>Hemibarbus maculatus</i>                         | [17]                              | Estuary                  | China                                          |
| <i>Hemichromis fasiatus</i>                         | [34]                              | Lake                     | Nigeria                                        |
| <i>Hemiculter bleekeri</i>                          | [25]                              | Lake                     | China                                          |
| <i>Hemiculter leucisculus</i>                       | [23]                              | River                    | China                                          |
| <i>Hemigrammus unilineatus</i>                      | [6]                               | River                    | Brazil                                         |
| <i>Henicorhynchus siamensis</i>                     | [16,40]                           | Reservoir, river         | Thailand                                       |
| <i>Hepsetus odoe</i>                                | [34]                              | Lake                     | Nigeria                                        |
| <i>Hoplias malabaricus</i>                          | [6,13]                            | River                    | Brazil                                         |
| <i>Hoplosternum littorale</i>                       | [13,54]                           | River                    | Brazil                                         |
| <i>Hypomasticus copelandii</i>                      | [13]                              | River                    | Brazil                                         |
| <i>Hypophthalmichthys molitrix</i>                  | [21,23,25,28]                     | River, lake              | China                                          |
| <i>Hypostomus affinis</i>                           | [13]                              | River                    | Brazil                                         |
| <i>Hypostomus ancistroides</i>                      | [14]                              | River                    | Brazil                                         |

|                                    |               |                                          |                                   |
|------------------------------------|---------------|------------------------------------------|-----------------------------------|
| <i>Hypostomus auroguttatus</i>     | [13]          | River                                    | Brazil                            |
| <i>Hypostomus cf. strigaticeps</i> | [14]          | River                                    | Brazil                            |
| <i>Hypostomus commersoni</i>       | [15]          | Estuary                                  | Argentina                         |
| <i>Hypostomus sp.</i>              | [13]          | River                                    | Brazil                            |
| <i>Iguanodectes rachovii</i>       | [6]           | River                                    | Brazil                            |
| <i>Imparfinis mirini</i>           | [14]          | River                                    | Brazil                            |
| <i>Labeo chrysophekadion</i>       | [40]          | River                                    | Thailand                          |
| <i>Labiobarbus leptocheilus</i>    | [16]          | Reservoir                                | Thailand                          |
| <i>Labiobarbus siamensis</i>       | [40]          | River                                    | Thailand                          |
| <i>Lalides longibarbis</i>         | [40]          | River                                    | Thailand                          |
| <i>Laimosemion strigatus</i>       | [6]           | River                                    | Brazil                            |
| <i>Lateolabrax maculatus</i>       | [17]          | Coast                                    | China                             |
| <i>Lates niloticus</i>             | [34,55]       | Lake                                     | Tanzania, Nigeria                 |
| <i>Leiognathus equulus</i>         | [22]          | River                                    | Taiwan                            |
| <i>Leiognathus ruconius</i>        | [3]           | Estuary                                  | China                             |
| <i>Leiognathus sp.</i>             | [10]          | Estuary                                  | China                             |
| <i>Lepomis gibosus</i>             | [7]           | River                                    | France                            |
| <i>Lepomis macrochirus</i>         | [27,56]       | River                                    | Korea<br>USA                      |
| <i>Lepomis megalotis</i>           | [56]          | River                                    | USA                               |
| <i>Leuciscus leuciscus</i>         | [1,8,57]      | River, lake                              | Switzerland, Russia, Germany      |
| <i>Lossogobius giuris</i>          | [21]          | River                                    | China                             |
| <i>Lota lota</i>                   | [1]           | River, lake                              | Germany                           |
| <i>Luciopimelodus pati</i>         | [15]          | Estuary                                  | Argentina                         |
| <i>Mastiglanis cf asopos</i>       | [6]           | River                                    | Brazil                            |
| <i>Megalechis thoracata</i>        | [6]           | River                                    | Brazil                            |
| <i>Megaleporinus conirostris</i>   | [13]          | River                                    | Brazil                            |
| <i>Megalobrama amblycephala</i>    | [21,25]       | River, lake                              | China                             |
| <i>Megalobrama hoffmanni</i>       | [28]          | River                                    | China                             |
| <i>Megalops atlanticus</i>         | [18]          | Wetland                                  | Colombia                          |
| <i>Metynnis guaporensis</i>        | [5]           | River                                    | Brazil                            |
| <i>Metynnis luna</i>               | [5]           | River                                    | Brazil                            |
| <i>Micropterus dolomieu</i>        | [58]          | Lake                                     | USA                               |
| <i>Micropterus salmoides</i>       | [20,27,45,59] | Reservoir, river, aquacul-<br>ture ponds | Korea<br>USA<br>China             |
| <i>Micropterus sp.</i>             | [29]          | River                                    | USA                               |
| <i>Misgurnus anguillicaudatus</i>  | [60]          | Co-culture ponds                         | China                             |
| <i>Monopterus albus</i>            | [60,61]       | Aquaculture, co-culture<br>ponds         | China                             |
| <i>Morone saxatilis</i>            | [42]          | Lake                                     | USA                               |
| <i>Mugil cephalus</i>              | [3,62]        | Estuary                                  | China, South Africa               |
| <i>Mugil curema</i>                | [18]          | Wetland                                  | Colombia                          |
| <i>Mugil liza</i>                  | [18]          | Wetland                                  | Colombia                          |
| <i>Muraenesox cinereus</i>         | [3,4]         | Wetland, estuary                         | China                             |
| <i>Myloplus asterias</i>           | [5]           | River                                    | Brazil                            |
| <i>Myloplus rhomboidalis</i>       | [5]           | River                                    | Brazil                            |
| <i>Myloplus rubripinnis</i>        | [5]           | River                                    | Brazil                            |
| <i>Myloplus schomburgkii</i>       | [5]           | River                                    | Brazil                            |
| <i>Mystacoleucus marginatus</i>    | [16]          | Reservoir                                | Thailand                          |
| <i>Mystus bocourti</i>             | [40]          | River                                    | Thailand                          |
| <i>Mystus macropterus</i>          | [43]          | River                                    | China                             |
| <i>Mystus mysticetus</i>           | [16]          | Reservoir                                | Thailand                          |
| <i>Nannacara taenia</i>            | [6]           | River                                    | Brazil                            |
| <i>Neogobius melanostomus</i>      | [1,29,63]     | River, lake                              | France, Germany, Switzerland, USA |
| <i>Notarius bonillai</i>           | [18]          | Wetland                                  | Colombia                          |
| <i>Notropis atherinoides</i>       | [29,31]       | River                                    | USA, Canada                       |
| <i>Notropis hudsonius</i>          | [29]          | River                                    | USA                               |
| <i>Notropis stramineus</i>         | [29]          | River                                    | USA                               |

|                                                      |                                    |                                                      |                                                                                  |
|------------------------------------------------------|------------------------------------|------------------------------------------------------|----------------------------------------------------------------------------------|
| <i>Odontesthes bonariensis</i>                       | [15]                               | Estuary                                              | Argentina                                                                        |
| <i>Oligosarcus hepsetus</i> ,                        | [13]                               | River                                                | Brazil                                                                           |
| <i>Oligosarcus oligolepis</i>                        | [15]                               | Estuary                                              | Argentina                                                                        |
| <i>Oncorhynchus clarkii bouvieri</i>                 | [64]                               | Lake                                                 | USA                                                                              |
| <i>Oncorhynchus mykiss</i>                           | [7,58]                             | River, lake                                          | France, USA                                                                      |
| <i>Oreochromis aureus</i>                            | [36]                               | River                                                | Ghana                                                                            |
| <i>Oreochromis mossambicus</i>                       | [11,21,36,59]                      | Aquaculture pond, river,<br>estuary                  | China, Ghana, South Africa                                                       |
| <i>Oreochromis niloticus</i>                         | [4,35,26,34,22,55,65,<br>66,67,36] | Reservoir, wetland, river,<br>lake, aquaculture pond | Mexico, China, Ethiopia, Egypt,<br>Tanzania, Nigeria, Taiwan,<br>Colombia, Ghana |
| <i>Osmerus eperlanus</i>                             | [68]                               | River                                                | England                                                                          |
| <i>Ossubtus xinguense</i>                            | [5]                                | River                                                | Brazil                                                                           |
| <i>Osteochilus vittatus</i>                          | [16]                               | Reservoir                                            | Thailand                                                                         |
| <i>Pachychilon pictum</i>                            | [7]                                | River                                                | France                                                                           |
| <i>Pachyurus adspersus</i>                           | [13]                               | River                                                | Brazil                                                                           |
| <i>Parabramis pekinensis</i>                         | [21]                               | River                                                | China                                                                            |
| <i>Paralaubuca harmandi</i>                          | [16]                               | Reservoir                                            | Thailand                                                                         |
| <i>Parambassis siamensis</i>                         | [16]                               | Reservoir                                            | Thailand                                                                         |
| <i>Parachanna obscura</i>                            | [34]                               | Lake                                                 | Nigeria                                                                          |
| <i>Parapimelodus valenciennis</i>                    | [15]                               | Estuary                                              | Argentina                                                                        |
| <i>Pelteobagrus vachelli</i>                         | [38]                               | River                                                | China                                                                            |
| <i>Pelteobagrus fulvidraco</i>                       | [43]                               | River                                                | China                                                                            |
| <i>Pelteobagrus fulvidraco</i>                       | [21]                               | River                                                | China                                                                            |
| <i>Pelteobagrus fulvidraco</i>                       | [38]                               | River                                                | China                                                                            |
| <i>Pelteobagrus nitidus</i>                          | [38]                               | River                                                | China                                                                            |
| <i>Pelteobagrus vachelli</i>                         | [43]                               | River                                                | China                                                                            |
| <i>Pennahia argentata</i>                            | [21]                               | River                                                | China                                                                            |
| <i>Perca fluviatilis</i>                             | [1,8,7,69]                         | River, lake                                          | Germany, Switzerland, France, Italy                                              |
| <i>Periophthalmus modestus</i>                       | [4]                                | Wetland                                              | China                                                                            |
| <i>Periophthalmus waltoni</i>                        | [70]                               | Wetland                                              | Iran                                                                             |
| <i>Phoxinus phoxinus</i>                             | [1,7]                              | River, lake                                          | Germany, France                                                                  |
| <i>Piabarchus stramineus</i>                         | [14]                               | River                                                | Brazil                                                                           |
| <i>Piaractus brachipomus</i>                         | [71]                               | Lake                                                 | India                                                                            |
| <i>Pimelodella geryi</i>                             | [6]                                | River                                                | Brazil                                                                           |
| <i>Pimelodus fur</i>                                 | [13]                               | River                                                | Brazil                                                                           |
| <i>Pimelodus grosskopfii</i>                         | [66]                               | Reservoir, aquaculture<br>pond                       | Colombia                                                                         |
| <i>Pimelodus maculatus</i>                           | [13,15]                            | Estuary, river                                       | Argentina, Brazil                                                                |
| <i>Pimephales promelas</i>                           | [29,31]                            | River                                                | Canada, USA                                                                      |
| <i>Pisodonophis boro</i>                             | [4]                                | Wetland                                              | China                                                                            |
| <i>Plagioscion squamosissimus</i>                    | [13]                               | River                                                | Brazil                                                                           |
| <i>Planiliza haematocheilus (Liza haematocheila)</i> | [17]                               | Estuary                                              | China                                                                            |
| <i>Platichthys flesus</i>                            | [68,44]                            | Estuary, river                                       | England, Portugal                                                                |
| <i>Poecilia latipinna</i>                            | [72]                               | Estuary                                              | USA                                                                              |
| <i>Poecilia reticulata</i>                           | [14]                               | River                                                | Brazil                                                                           |
| <i>Polycentrus schomburgkii</i>                      | [6]                                | River                                                | Brazil                                                                           |
| <i>Polydactylus sexfilis</i>                         | [3]                                | Estuary                                              | China                                                                            |
| <i>Pomadasys argenteus</i>                           | [22]                               | River                                                | Taiwan                                                                           |
| <i>Pristobrycon cf. scapularis</i>                   | [5]                                | River                                                | Brazil                                                                           |
| <i>Pristobrycon eigenmanni</i>                       | [5]                                | River                                                | Brazil                                                                           |
| <i>Pristolepis fasciatus</i>                         | [16]                               | Reservoir                                            | Thailand                                                                         |
| <i>Prochilodus brevis</i>                            | [39]                               | Reservoir                                            | Brazil                                                                           |
| <i>Prochilodus lineatus</i>                          | [13,15,73,74]                      | River, estuary                                       | Brazil, Argentina                                                                |
| <i>Prochilodus magdalenae</i>                        | [66]                               | Reservoir, aquaculture<br>pond                       | Colombia                                                                         |
| <i>Psalidodon aff. paranae</i>                       | [14]                               | River                                                | Brazil                                                                           |
| <i>Psalidodon fasciatus</i>                          | [13,14]                            | River                                                | Brazil                                                                           |
| <i>Pseudobagrus ussuriensis</i>                      | [38]                               | River                                                | China                                                                            |

|                                                          |               |                  |                                     |
|----------------------------------------------------------|---------------|------------------|-------------------------------------|
| <i>Pseudogobio esocinus</i>                              | [20]          | River            | Korea                               |
| <i>Pseudoplatystoma corruscans</i>                       | [15]          | Estuary          | argentina                           |
| <i>Pseudorasbora parva</i>                               | [7,25]        | River, lake      | France, China                       |
| <i>Pterygoplichthys pardalis</i>                         | [22]          | River            | Taiwan                              |
| <i>Puntioplites proctozysron</i>                         | [40,16]       | River, reservoir | Thailand                            |
| <i>Pygocentrus nattereri</i>                             | [5]           | River            | Brazil                              |
| <i>Rasbora aurotaenia</i>                                | [16]          | reservoir        | Thailand                            |
| <i>Rhamdia quelen</i>                                    | [13]          | River            | Brazil                              |
| <i>Rhodeus sericeus</i>                                  | [7]           | River            | France                              |
| <i>Rineloricaria pentamaculata</i>                       | [14]          | River            | Brazil                              |
| <i>Rutilus frisii</i>                                    | [75]          | Coastal area     | Iran                                |
| <i>Rutilus rutilus</i>                                   | [2,7,8,51,76] | River, lake      | France, Poland, England, Swizerland |
| <i>Salmo trutta</i>                                      | [7,77,78]     | River, estuary   | Ireland, Sweden, France             |
| <i>Salvelinus fontinalis</i>                             | [58]          | Lake             | USA                                 |
| <i>Salvelinus namaycush</i>                              | [64]          | Lake             | USA                                 |
| <i>Sander lucioperca</i>                                 | [7,1]         | River, lake      | France, Germany                     |
| <i>Sarotheron melanotheron</i>                           | [34,36]       | Lake, river      | Nigeria, Ghana                      |
| <i>Scardinius erythrophthalmus</i>                       | [1]           | River, lake      | Germany                             |
| <i>Sciades herzbergii</i>                                | [30]          | Estuary          | Brazil                              |
| <i>Sciades proops</i>                                    | [18]          | Wetland          | Colombia                            |
| <i>Serrasalmus cf. altispinis</i>                        | [5]           | River            | Brazil                              |
| <i>Serrasalmus manuelei</i>                              | [5]           | River            | Brazil                              |
| <i>Serrasalmus rhombeus</i>                              | [5]           | River            | Brazil                              |
| <i>Silurus asotus</i>                                    | [27]          | River            | Korea                               |
| <i>Silurus glanis</i>                                    | [7,1]         | River, lake      | France, Germany                     |
| <i>Sinibrama wui</i>                                     | [38]          | River            | China                               |
| <i>Siniperca chuatsi</i>                                 | [21,38]       | River            | China                               |
| <i>Squalidus argentatus</i>                              | [38]          | River            | China                               |
| <i>Squaliobarbus curriculus</i>                          | [28]          | River            | China                               |
| <i>Squalius cephalus</i>                                 | [79,1,7]      | River, lake      | Germany, France                     |
| <i>Synechogobius ommaturus (Acanthogobius ommaturus)</i> | [17]          | Estuary          | China                               |
| <i>Taenioides anguillaris</i>                            | [3]           | Estuary          | China                               |
| <i>Trachelyopterus insignis</i>                          | [18]          | Wetland          | Colombia                            |
| <i>Terapon jarbua</i>                                    | [4,11]        | Wetland, estuary | China, South Africa                 |
| <i>Tinca tinca</i>                                       | [1]           | River, lake      | Germany                             |
| <i>Tometes ancyloirhynchus</i>                           | [5]           | River            | Brazil                              |
| <i>Tometes kranponhah</i>                                | [5]           | River            | Brazil                              |
| <i>Trachelyopterus striatulus</i>                        | [13]          | River            | Brazil                              |
| <i>Tylosurus melanotu</i>                                | [4]           | Wetland          | China                               |
| <i>Zacco platypus</i>                                    | [20]          | River            | Korea                               |

---

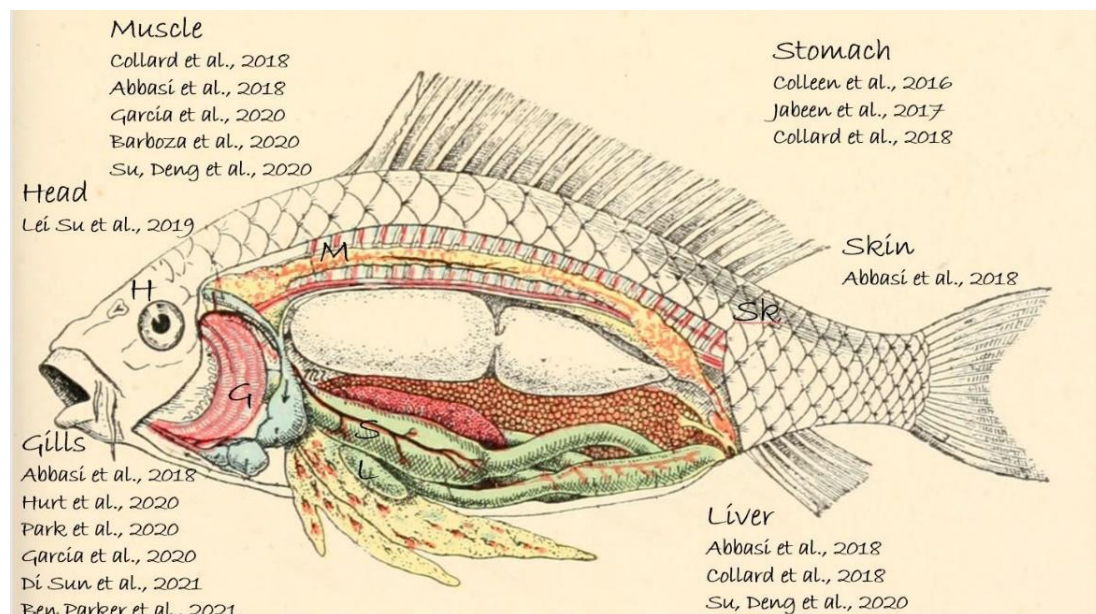

**Figure S2.** Summary of the studies that reported MPs presence in fish organs different from the whole gastrointestinal tract (that is the most frequently studied body compartment).

## References

1. Roch, S.; Walter, T.; Ittner, L.D.; Friedrich, C.; Brinker, A. A systematic study of the microplastic burden in freshwater fishes of south-western Germany—Are we searching at the right scale? *Sci. Total Environ.* **2019**, *689*, 1001–1011, doi:10.1016/j.scitotenv.2019.06.404.
2. Faure, F.; Corbaz, M.; Baecher, H.; De Alencastro, L.F. Pollution due to plastics and microplastics in lake Geneva and in the Mediterranean sea. *Arch. des Sci.* **2012**, *65*, 157–164, doi:10.5169/seals-738358.
3. Lin, L.; Ma, L.S.; Li, H.X.; Pan, Y.F.; Liu, S.; Zhang, L.; Peng, J.P.; Fok, L.; Xu, X.R.; He, W.H. Low level of microplastic contamination in wild fish from an urban estuary. *Mar. Pollut. Bull.* **2020**, *160*, 111650, doi:10.1016/j.marpolbul.2020.111650.
4. Huang, J.S.; Koongolla, J.B.; Li, H.X.; Lin, L.; Pan, Y.F.; Liu, S.; He, W.H.; Maharana, D.; Xu, X.R. Microplastic accumulation in fish from Zhanjiang mangrove wetland, South China. *Sci. Total Environ.* **2020**, *708*, doi:10.1016/j.scitotenv.2019.134839.
5. Andrade, M.C.; Winemiller, K.O.; Barbosa, P.S.; Fortunati, A.; Chelazzi, D.; Cincinelli, A.; Giarrizzo, T. First account of plastic pollution impacting freshwater fishes in the Amazon: Ingestion of plastic debris by piranhas and other serrasalmids with diverse feeding habits. *Environ. Pollut.* **2019**, *244*, 766–773, doi:10.1016/j.envpol.2018.10.088.
6. Ribeiro-Brasil, D.R.G.; Torres, N.R.; Picanço, A.B.; Sousa, D.S.; Ribeiro, V.S.; Brasil, L.S.; Montag, L.F. de A. Contamination of stream fish by plastic waste in the Brazilian Amazon. *Environ. Pollut.* **2020**, *266*, 115241, doi:10.1016/j.envpol.2020.115241.
7. Garcia, F.; De Carvalho, A.R.; Riem-Galliano, L.; Tudesque, L.; Albignac, M.; Ter Halle, A.; Cucherousset, J. Stable Isotope Insights into Microplastic Contamination within Freshwater Food Webs. *Environ. Sci. Technol.* **2021**, *55*, 1024–1035, doi:10.1021/acs.est.0c06221.
8. Faure, F.; Demars, C.; Wieser, O.; Kunz, M.; De Alencastro, L.F. Plastic pollution in Swiss surface waters: Nature and concentrations, interaction with pollutants. *Environ. Chem.* **2015**, *12*, 582–591, doi:10.1071/EN14218.
9. Gray Ryan, M.; Watkins, L.; Todd Walter, M. Hudson River juvenile Blueback herring avoid ingesting microplastics. *Mar. Pollut. Bull.* **2019**, doi:10.1016/j.marpolbul.2019.07.004.
10. Suresh, A.; Vijayaraghavan, G.; Saranya, K.S.; Neethu, K.V.; Aneesh, B.; Bijoy Nandan, S. Microplastics distribution and contamination from the Cochin coastal zone, India. *Reg. Stud. Mar. Sci.* **2020**, *40*, doi:10.1016/j.rsma.2020.101533.
11. Naidoo, T.; Sershen; Thompson, R.C.; Rajkaran, A. Quantification and characterisation of microplastics ingested by selected juvenile fish species associated with mangroves in KwaZulu-Natal, South Africa. *Environ. Pollut.* **2020**, *257*, doi:10.1016/j.envpol.2019.113635.
12. Cordova, M.R.; Riani, E.; Shiimoto, A. Microplastics ingestion by blue panchax fish (*Aplocheilichthys* sp.) from Ciliwung Estuary, Jakarta, Indonesia. *Mar. Pollut. Bull.* **2020**, *161*, 111763, doi:10.1016/j.marpolbul.2020.111763.
13. Lima, F.P.; Azevedo-Santos, V.M.; Santos, V.M.R.; Vidotto-Magnoni, A.P.; Soares, C.L.; Manzano, F.V.; Nobile, A.B. Plastic Ingestion by Commercial and Non-Commercial Fishes from a Neotropical River Basin. *Water Air Soil Pollut.* **2021**, *232*, doi:10.1007/s11270-020-04964-6.
14. Garcia, T.D.; Cardozo, A.L.P.; Quirino, B.A.; Yofukuji, K.Y.; Ganassin, M.J.M.; dos Santos, N.C.L.; Fugui, R. Ingestion of Microplastic by Fish of Different Feeding Habits in Urbanized and Non-urbanized Streams in Southern Brazil. *Water Air Soil Pollut.* **2020**, *231*, 1–11, doi:10.1007/s11270-020-04802-9.
15. Pazos, R.S.; Maiztegui, T.; Colautti, D.C.; Paracampo, A.H.; Gómez, N. Microplastics in gut contents of coastal freshwater fish from Río de la Plata estuary. *Mar. Pollut. Bull.* **2017**, *122*, 85–90, doi:10.1016/j.marpolbul.2017.06.007.

16. Kasamesiri, P.; Meksumpun, C.; Meksumpun, S.; Ruengsorn, C. Assessment on microplastics contamination in freshwater fish: a case study of the Ubolratana Reservoir, Thailand. *Int. J. GEOMATE* **2021**, 62–68, doi:10.21660/2020.77.6108.
17. Su, L.; Deng, H.; Li, B.; Chen, Q.; Pettigrove, V.; Wu, C.; Shi, H. The occurrence of microplastic in specific organs in commercially caught fishes from coast and estuary area of east China. *J. Hazard. Mater.* **2019**, 365, 716–724, doi:10.1016/j.jhazmat.2018.11.024.
18. Garcés-Ordóñez, O.; Mejía-Esquivia, K.A.; Sierra-Labastidas, T.; Patiño, A.; Blandón, L.M.; Espinosa Díaz, L.F. Prevalence of microplastic contamination in the digestive tract of fishes from mangrove ecosystem in Cispata, Colombian Caribbean. *Mar. Pollut. Bull.* **2020**, 154, doi:10.1016/J.MARPOLBUL.2020.111085.
19. Calderon, E.A.; Hansen, P.; Rodríguez, A.; Blettler, M.C.M.; Syberg, K.; Khan, F.R. Microplastics in the Digestive Tracts of Four Fish Species from the Ciénaga Grande de Santa Marta Estuary in Colombia. *Water Air Soil Pollut.* **2019**, 230, doi:10.1007/S11270-019-4313-8.
20. Park, T.J.; Lee, S.H.; Lee, M.S.; Lee, J.K.; Park, J.H.; Zoh, K.D. Distributions of microplastics in surface water, fish, and sediment in the vicinity of a sewage treatment plant. *Water* **2020**, 12, 3333, doi:10.3390/w12123333.
21. Wang, S.; Zhang, C.; Pan, Z.; Sun, D.; Zhou, A.; Xie, S.; Wang, J.; Zou, J. Microplastics in wild freshwater fish of different feeding habits from Beijiang and Pearl River Delta regions, south China. *Chemosphere* **2020**, 258, 127345, doi:10.1016/j.chemosphere.2020.127345.
22. Tien, C.J.; Wang, Z.X.; Chen, C.S. Microplastics in water, sediment and fish from the Fengshan River system: Relationship to aquatic factors and accumulation of polycyclic aromatic hydrocarbons by fish. *Environ. Pollut.* **2020**, 265, 114962, doi:10.1016/j.envpol.2020.114962.
23. Li, B.; Su, L.; Zhang, H.; Deng, H.; Chen, Q.; Shi, H. Microplastics in fishes and their living environments surrounding a plastic production area. *Sci. Total Environ.* **2020**, 727, 138662, doi:10.1016/j.scitotenv.2020.138662.
24. Yuan, W.; Liu, X.; Wang, W.; Di, M.; Wang, J. Microplastic abundance, distribution and composition in water, sediments, and wild fish from Poyang Lake, China. *Ecotoxicol. Environ. Saf.* **2019**, 170, 180–187, doi:10.1016/j.ecoenv.2018.11.126.
25. Jabeen, K.; Su, L.; Li, J.; Yang, D.; Tong, C.; Mu, J.; Shi, H. Microplastics and mesoplastics in fish from coastal and fresh waters of China. *Environ. Pollut.* **2017**, 221, 141–149, doi:10.1016/j.envpol.2016.11.055.
26. Merga, L.B.; Redondo-Hasselerharm, P.E.; Van den Brink, P.J.; Koelmans, A.A. Distribution of microplastic and small macroplastic particles across four fish species and sediment in an African lake. *Sci. Total Environ.* **2020**, 741, 140527, doi:10.1016/j.scitotenv.2020.140527.
27. Park, T.J.; Lee, S.H.S.H.; Lee, M.S.; Lee, J.K.; Lee, S.H.S.H.; Zoh, K.D. Occurrence of microplastics in the Han River and riverine fish in South Korea. *Sci. Total Environ.* **2020**, 708, 134535, doi:10.1016/j.scitotenv.2019.134535.
28. Zheng, K.; Fan, Y.; Zhu, Z.; Chen, G.; Tang, C.; Peng, X. Occurrence and Species-Specific Distribution of Plastic Debris in Wild Freshwater Fish from the Pearl River Catchment, China. *Environ. Toxicol. Chem.* **2019**, 38, 1504–1513, doi:10.1002/etc.4437.
29. McNeish, R.E.; Kim, L.H.; Barrett, H.A.; Mason, S.A.; Kelly, J.J.; Hoellein, T.J. Microplastic in riverine fish is connected to species traits. *Sci. Rep.* **2018**, 8, 11639, doi:10.1038/s41598-018-29980-9.
30. Possatto, F.E.; Barletta, M.; Costa, M.F.; Ivar do Sul, J.A.; Dantas, D. V. Plastic debris ingestion by marine catfish: An unexpected fisheries impact. *Mar. Pollut. Bull.* **2011**, 62, 1098–1102, doi:10.1016/J.MARPOLBUL.2011.01.036.
31. Campbell, S.H.; Williamson, P.R.; Hall, B.D. Microplastics in the gastrointestinal tracts of fish and the water from an urban prairie creek. *FACETS* **2017**, 2, 395–409, doi:10.1139/facets-2017-0008.
32. Ferreira, G.V.B.; Barletta, M.; Lima, A.R.A. Use of estuarine resources by top predator fishes. How do ecological patterns affect rates of contamination by microplastics? *Sci. Total Environ.* **2019**, 655, 292–304, doi:10.1016/J.SCITOTENV.2018.11.229.
33. Sembiring, E.; Fareza, A.A.; Suendo, V.; Reza, M. The Presence of Microplastics in Water, Sediment, and Milkfish (*Chanos chanos*) at the Downstream Area of Citarum River, Indonesia. *Water Air Soil Pollut.* **2020**, 231, 1–14, doi:10.1007/s11270-020-04710-y.
34. Adeogun, A.O.; Ibor, O.R.; Khan, E.A.; Chukwuka, A. V.; Omogbemi, E.D.; Arukwe, A. Detection and occurrence of microplastics in the stomach of commercial fish species from a municipal water supply lake in southwestern Nigeria. *Environ. Sci. Pollut. Res.* **2020**, 27, 31035–31045, doi:10.1007/s11356-020-09031-5.
35. Sun, D.; Wang, J.; Xie, S.; Tang, H.; Zhang, C.; Xu, G.; Zou, J.; Zhou, A. Characterization and spatial distribution of microplastics in two wild captured economic freshwater fish from north and west rivers of Guangdong province. *Ecotoxicol. Environ. Saf.* **2021**, 207, 111555, doi:10.1016/j.ecoenv.2020.111555.
36. Adu-Boahen, K.; Dadson, I.Y.; Mensah, D.K.D.; Kyeremeh, S. Mapping ecological impact of microplastics on freshwater habitat in the central region of Ghana: a case study of River Akora. *GeoJournal* **2020**, 1–19, doi:10.1007/s10708-020-10273-6.
37. Pegado, T. de S. e S.; Schmid, K.; Winemiller, K.O.; Chelazzi, D.; Cincinelli, A.; Dei, L.; Giarrizzo, T. First evidence of microplastic ingestion by fishes from the Amazon River estuary. *Mar. Pollut. Bull.* **2018**, 133, 814–821, doi:10.1016/j.marpolbul.2018.06.035.
38. Zhang, K.; Xiong, X.; Hu, H.; Wu, C.; Bi, Y.; Wu, Y.; Zhou, B.; Lam, P.K.S.; Liu, J. Occurrence and Characteristics of Microplastic Pollution in Xiangxi Bay of Three Gorges Reservoir, China. *Environ. Sci. Technol.* **2017**, 51, 3794–3801, doi:10.1021/acs.est.7b00369.
39. de Oliveira, J.C.D.; de Oliveira, J.F.; Marques, A. de O.; Peretti, D.; da Costa, R.S.; Novaes, J.L.C. Trophic ecology of detritivorous fish along a reservoir cascade in a tropical semi-arid region. *Ecol. Freshw. Fish* **2021**, 30, 234–243, doi:10.1111/eff.12579.
40. Kasamesiri, P.; Thaimuangphol, W. Microplastics Ingestion by Freshwater Fish in The Chi River, Thailand. *Int. J. Geomate* **2020**, 18, 114–119, doi:10.21660/2020.67.9110.
41. Ferreira, G.V.B.; Barletta, M.; Lima, A.R.A.; Dantas, D. V.; Justino, A.K.S.; Costa, M.F. Plastic debris contamination in the life cycle of Acoupa weakfish ( *Cynoscion acoupa* ) in a tropical estuary . *ICES J. Mar. Sci. J. du Cons.* **2016**, 73, 2695–2707, doi:10.1093/ICESJMS/FSW108.
42. Baldwin, A.K.; Spanjer, A.R.; Rosen, M.R.; Thom, T. Microplastics in Lake Mead National Recreation Area, USA: Occurrence and biological uptake. *PLoS One* **2020**, 15, e0228896, doi:10.1371/journal.pone.0228896.



43. Zhang, L.; Xie, Y.; Zhong, S.; Liu, J.; Qin, Y.; Gao, P. Microplastics in freshwater and wild fishes from Lijiang River in Guangxi, Southwest China. *Sci. Total Environ.* **2021**, *755*, 142428, doi:10.1016/j.scitotenv.2020.142428.
44. Bessa, F.; Barria, P.; Neto, J.M.; Frias, J.P.G.L.; Otero, V.; Sobral, P.; Marques, J.C. Occurrence of microplastics in commercial fish from a natural estuarine environment. *Mar. Pollut. Bull.* **2018**, *128*, 575–584, doi:10.1016/j.MARPOLBUL.2018.01.044.
45. Hurt, R.; O'Reilly, C.M.; Perry, W.L. Microplastic prevalence in two fish species in two U.S. reservoirs. *Limnol. Oceanogr. Lett.* **2020**, *5*, 147–153, doi:10.1002/lol2.10140.
46. Ramos, J.A.A.; Barletta, M.; Costa, M.F. Ingestion of nylon threads by Gerreidae while using a tropical estuary as foraging grounds. *Aquat. Biol.* **2012**, *17*, 29–34, doi:10.3354/AB00461.
47. RRodríguez-Sierra, C.M.; Antón-Pardo, M.; Quintana, X.D.; Armengol, X. Microplastics ingestion by the exotic fish *Gambusia holbrooki* in two Mediterranean coastal lagoons. *Ecosistemas* **2020**, *29*, doi:10.7818/ECOS.2097.
48. Su, L.; Nan, B.; Hassell, K.L.; Craig, N.J.; Pettigrove, V. Microplastics biomonitoring in Australian urban wetlands using a common noxious fish (*Gambusia holbrooki*). *Chemosphere* **2019**, *228*, 65–74, doi:10.1016/j.chemosphere.2019.04.114.
49. Slootmaekers, B.; Catarci Carteny, C.; Belpaire, C.; Saverwyns, S.; Fremout, W.; Blust, R.; Bervoets, L. Microplastic contamination in gudgeons (*Gobio gobio*) from Flemish rivers (Belgium). *Environ. Pollut.* **2019**, *244*, 675–684, doi:10.1016/j.envpol.2018.09.136.
50. Sanchez, W.; Bender, C.; Porcher, J.M. Wild gudgeons (*Gobio gobio*) from French rivers are contaminated by microplastics: Preliminary study and first evidence. *Environ. Res.* **2014**, *128*, 98–100, doi:10.1016/j.envres.2013.11.004.
51. Kuśmierek, N.; Popiołek, M. Microplastics in freshwater fish from Central European lowland river (Widawa R., SW Poland). *Environ. Sci. Pollut. Res.* **2020**, *27*, 11438–11442, doi:10.1007/s11356-020-08031-9.
52. Xiong, X.; Zhang, K.; Chen, X.; Shi, H.; Luo, Z.; Wu, C. Sources and distribution of microplastics in China's largest inland lake—Qinghai Lake. *Environ. Pollut.* **2018**, *235*, 899–906, doi:10.1016/j.envpol.2017.12.081.
53. Silva, J.D.B.; Barletta, M.; Lima, A.R.A.; Ferreira, G.V.B. Use of resources and microplastic contamination throughout the life cycle of grunts (Haemulidae) in a tropical estuary. *Environ. Pollut.* **2018**, *242*, 1010–1021, doi:10.1016/J.ENVPOL.2018.07.038.
54. Silva-Cavalcanti, J.S.; Silva, J.D.B.; França, E.J. de; Araújo, M.C.B. de; Gusmão, F. Microplastics ingestion by a common tropical freshwater fishing resource. *Environ. Pollut.* **2017**, *221*, 218–226, doi:10.1016/j.envpol.2016.11.068.
55. Biginagwa, F.J.; Mayoma, B.S.; Shashoua, Y.; Syberg, K.; Khan, F.R. First evidence of microplastics in the African Great Lakes: Recovery from Lake Victoria Nile perch and Nile tilapia. *J. Great Lakes Res.* **2016**, *42*, 146–149, doi:10.1016/j.jglr.2015.10.012.
56. Peters, C.A.; Bratton, S.P. Urbanization is a major influence on microplastic ingestion by sunfish in the Brazos River Basin, Central Texas, USA. *Environ. Pollut.* **2016**, *210*, 380–387, doi:10.1016/j.envpol.2016.01.018.
57. Frank Yulia, A.; Vorobiev Egor, D.; Babkina Irina, B.; Antsiferov Dmitry, V.; Vorobiev Danil, S. Microplastics in fish gut, first records from the Tom River in West Siberia, Russia. *Vestn. Tomsk. Gos. Univ. Biol.* **2020**, 130–139, doi:10.17223/19988591/52/7.
58. Wagner, J.; Wang, Z.-M.; Ghosal, S.; Murphy, M.; Wall, S.; Cook, A.-M.; Robberson, W.; Allen, H. Nondestructive Extraction and Identification of Microplastics from Freshwater Sport Fish Stomachs. *Environ. Sci. Technol.* **2019**, *53*, 14496–14506, doi:10.1021/acs.est.9b05072.
59. LLi, Y.; Chen, G.; Xu, K.; Huang, K.; Wang, J. Microplastics environmental effect and risk assessment on the aquaculture systems from south China. *Int. J. Environ. Res. Public Health* **2021**, *18*, 1–14, doi:10.3390/ijerph18041869.
60. Lv, W.; Zhou, W.; Lu, S.; Huang, W.; Yuan, Q.; Tian, M.; Lv, W.; He, D. Microplastic pollution in rice-fish co-culture system: A report of three farmland stations in Shanghai, China. *Sci. Total Environ.* **2019**, *652*, 1209–1218, doi:10.1016/j.scitotenv.2018.10.321.
61. Lv, W.; Yuan, Q.; He, D.; Lv, W.; Zhou, W. Microplastic contamination caused by different rearing modes of Asian swamp eel (*Monopterus albus*). *Aquac. Res.* **2020**, *51*, 5084–5095, doi:10.1111/are.14847.
62. Naidoo, T.; Smit, A.J.; Glassom, D. Plastic ingestion by estuarine mullet *Mugil cephalus* (Mugilidae) in an urban harbour, Kwa-Zulu-Natal, South Africa. *African J. Mar. Sci.* **2016**, *38*, 145–149, doi:10.2989/1814232X.2016.1159616.
63. Bosshart, S.; Erni-Cassola, G.; Burkhardt-Holm, P. Independence of microplastic ingestion from environmental load in the round goby (*Neogobius melanostomus*) from the Rhine river using high quality standards. *Environ. Pollut.* **2020**, *267*, 115664, doi:10.1016/j.envpol.2020.115664.
64. Driscoll, S.C.; Glassic, H.C.; Guy, C.S.; Koel, T.M. Presence of microplastics in the food web of the largest high-elevation lake in north america. *Water* **2021**, *13*, 264, doi:10.3390/w13030264.
65. Martinez-Tavera, E.; Duarte-Moro, A.M.; Sujitha, S.B.; Rodriguez-Espinosa, P.F.; Rosano-Ortega, G.; Expósito, N. Microplastics and metal burdens in freshwater Tilapia (*Oreochromis niloticus*) of a metropolitan reservoir in Central Mexico: Potential threats for human health. *Chemosphere* **2021**, *266*, 128968, doi:10.1016/j.chemosphere.2020.128968.
66. Garcia, A.G.; Suárez, D.C.; Li, J.; Rotchell, J.M. A comparison of microplastic contamination in freshwater fish from natural and farmed sources. *Environ. Sci. Pollut. Res.* **2021**, *28*, 14488–14497, doi:10.1007/s11356-020-11605-2.
67. Khan, F.R.; Shashoua, Y.; Crawford, A.; Drury, A.; Sheppard, K.; Stewart, K.; Sculthorp, T. 'The Plastic Nile': First Evidence of Microplastic Contamination in Fish from the Nile River (Cairo, Egypt). *Toxics* **2020**, *8*, 22, doi:10.3390/toxics8020022.
68. Mcgoran, A.R.; Clark, P.F.; Morritt, D. Presence of microplastic in the digestive tracts of European flounder, *Platichthys flesus*, and European smelt, *Osmerus eperlanus*, from the River Thames. *Environ. Pollut.* **2017**, *220*, 744–751, doi:10.1016/j.envpol.2016.09.078.
69. Galafassi, S.; Sighicelli, M.; Pusceddu, A.; Bettinetti, R.; Cau, A.; Temperini, M.E.; Gillibert, R.; Ortolani, M.; Pietrelli, L.; Zaupa, S.; et al. Microplastic pollution in perch (*Perca fluviatilis*, Linnaeus 1758) from Italian south-alpine lakes. *Environ. Pollut.* **2021**, *288*, 117782, doi:10.1016/J.ENVPOL.2021.117782.
70. Maghsodian, Z.; Sanati, A.M.; Ramavandi, B.; Ghasemi, A.; Sorial, G.A. Microplastics accumulation in sediments and Periophthalmus waltoni fish, mangrove forests in southern Iran. *Chemosphere* **2021**, *264*, doi:10.1016/J.CHEMOSPHERE.2020.128543.

71. Devi, S.S.; Sreedevi, A.V.; Kumar, A.B. First report of microplastic ingestion by the alien fish Pirapitinga (*Piaractus brachypomus*) in the Ramsar site Vembanad Lake, south India. *Mar. Pollut. Bull.* **2020**, *160*, 111637, doi:10.1016/j.marpolbul.2020.111637.
72. Talley, T.S.; Venuti, N.; Whelan, R. Natural history matters: Plastics in estuarine fish and sediments at the mouth of an urban watershed. *PLoS One* **2020**, *15*, doi:10.1371/JOURNAL.PONE.0229777.
73. Urbanski, B.Q.; Denadai, A.C.; Azevedo-Santos, V.M.; Nogueira, M.G. First record of plastic ingestion by an important commercial native fish (*Prochilodus lineatus*) in the middle Tietê River basin, Southeast Brazil. *Biota Neotrop.* **20**, 2020, doi:10.1590/1676-0611-BN-2020-1005.
74. Blettler, M.C.M.; Abrial, E.; Khan, F.R.; Sivri, N.; Espinola, L.A. Freshwater plastic pollution: Recognizing research biases and identifying knowledge gaps. *Water Res.* **2018**, *143*, 416–424.
75. Taghizadeh Rahmat Abadi, Z.; Abtahi, B.; Grossart, H.P.; Khodabandeh, S. Microplastic content of Kutum fish, *Rutilus frisii kutum* in the southern Caspian Sea. *Sci. Total Environ.* **2021**, *752*, doi:10.1016/J.SCITOTENV.2020.141542.
76. Horton, A.A.; Jürgens, M.D.; Lahive, E.; van Bodegom, P.M.; Vijver, M.G. The influence of exposure and physiology on microplastic ingestion by the freshwater fish *Rutilus rutilus* (roach) in the River Thames, UK. *Environ. Pollut.* **2018**, *236*, 188–194, doi:10.1016/j.envpol.2018.01.044.
77. O'Connor, J.D.; Mahon, A.M.; Ramsperger, A.F.R.M.; Trotter, B.; Redondo-Hasselerharm, P.E.; Koelmans, A.A.; Lally, H.T.; Murphy, S. Microplastics in Freshwater Biota: A Critical Review of Isolation, Characterization, and Assessment Methods. *Glob. Chall.* **2020**, *4*, 1800118, doi:10.1002/gch2.201800118.
78. Karlsson, T.M.; Vethaak, A.D.; Almroth, B.C.; Ariese, F.; van Velzen, M.; Hassellöv, M.; Leslie, H.A. Screening for microplastics in sediment, water, marine invertebrates and fish: Method development and microplastic accumulation. *Mar. Pollut. Bull.* **2017**, *122*, 403–408, doi:10.1016/j.marpolbul.2017.06.081.
79. Collard, F.; Gasperi, J.; Gilbert, B.; Eppe, G.; Azimi, S.; Rocher, V.; Tassin, B. Anthropogenic particles in the stomach contents and liver of the freshwater fish *Squalius cephalus*. *Sci. Total Environ.* **2018**, *643*, 1257–1264, doi:10.1016/j.scitotenv.2018.06.313.
